# Supplementary material for: European Grapevine Moth and Vitis vinifera L. Phenology in the Douro Region: (A)synchrony and Climate Scenarios
Source: MDPI journal article supplement (doi:10.3390/agronomy12010098), 2021-12-31
Supplement: s1 [file s1]

# European grapevine moth and *Vitis vinifera* L. phenology in the Douro region: (a)synchrony and climate scenarios

Samuel Reis<sup>1\*</sup>, Joana Martins<sup>2</sup>, Fátima Gonçalves<sup>2,3</sup>, Cristina Carlos<sup>2,4</sup> and João A. Santos<sup>2</sup>

<sup>1</sup> CoLAB VINES&WINES-National Collaborative Laboratory for the Portuguese Wine Sector, Associação para o Desenvolvimento da Viticultura Duriense (ADVID), Edifício Centro de Excelência da Vinha e do Vinho, Régia Douro Park, 5000-033 Vila Real, Portugal

<sup>2</sup> Centre for the Research and Technology of Agro-Environmental and Biological Sciences, CITAB, Universidade de Trás-os-Montes e Alto Douro, UTAD, 5000-801 Vila Real, Portugal; joanamartins@utad.pt (J.M.); jsantos@utad.pt (J.A.S.)

<sup>3</sup> Mountain Research Center, CIMO, Instituto Politécnico de Bragança, Campus de Santa Apolónia, 5300-253, Bragança, Portugal; mariagoncalves@ipb.pt (F.G.)

<sup>4</sup> ADVID, Associação para o Desenvolvimento da Viticultura Duriense, Parque de Ciência e Tecnologia de Vila Real-Régia Douro Park, 5000-033 Vila Real, Portugal; cristina.carlos@advid.pt (C.C.)

\*Correspondence: samuel.reis@advid.pt

## Supplementary Material

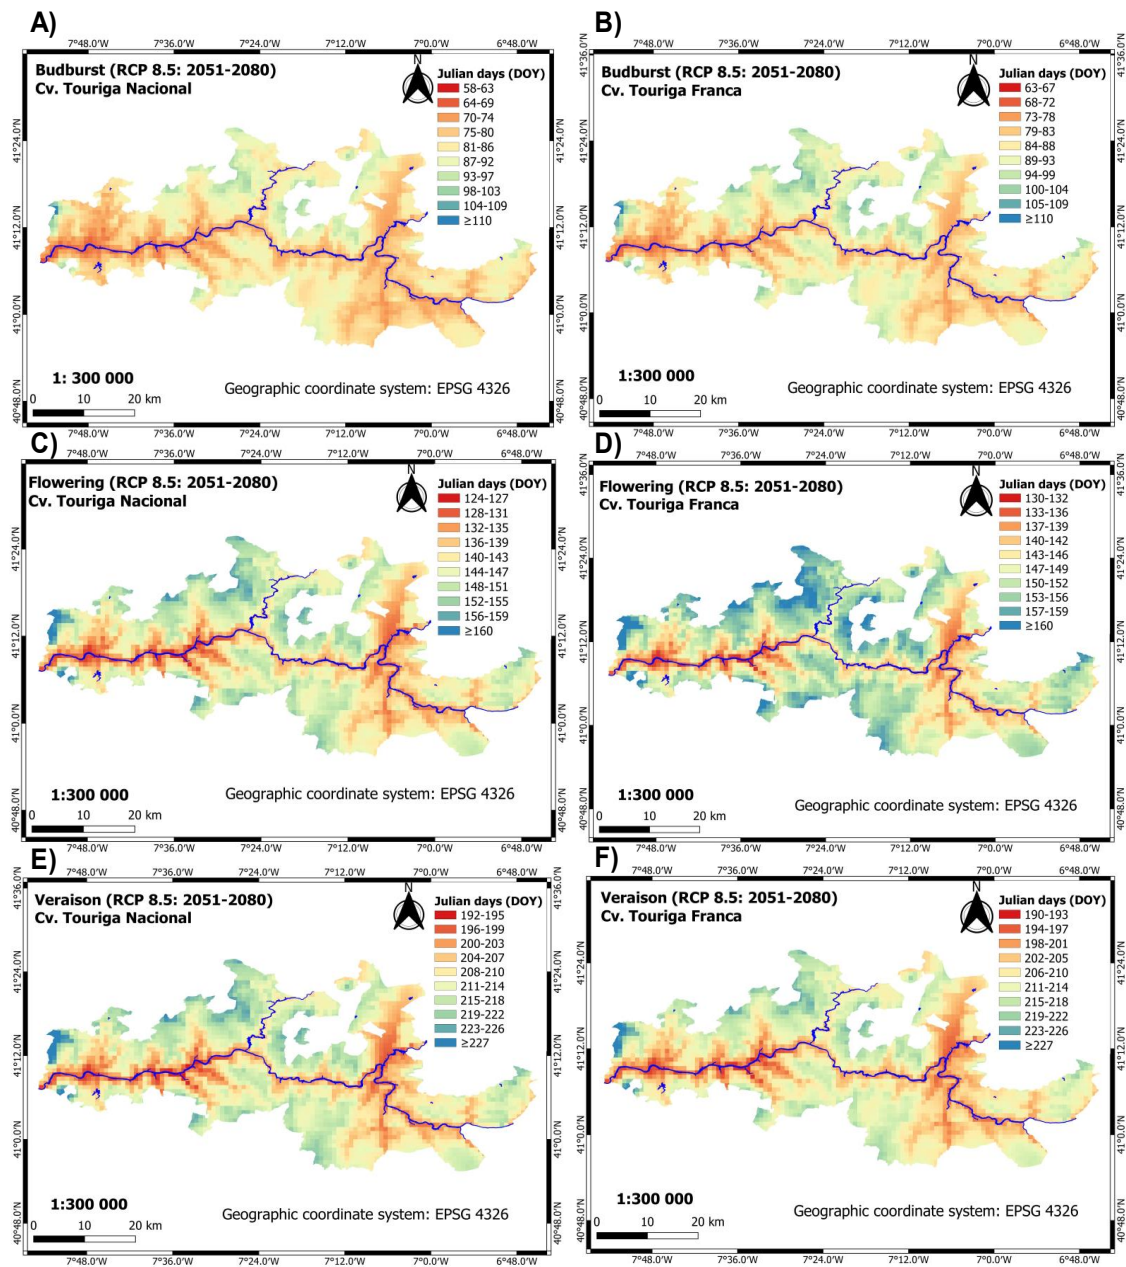

**Figure S1:** Phenology maps for the future period (2051–2080, RCP8.5) covering the entire Douro Demarcated Region. A color scale represents the Julian days (DOY) obtained by the phenology models for each phenological stage, namely budburst (A) and (B), flowering (C) and (D) and veraison (E) and (F). The varieties chosen were cv. *Touriga Nacional* (left) and *Touriga Franca* (right). In addition, it is integrated into the Douro river (thick blue line) along with the three sub-regions.

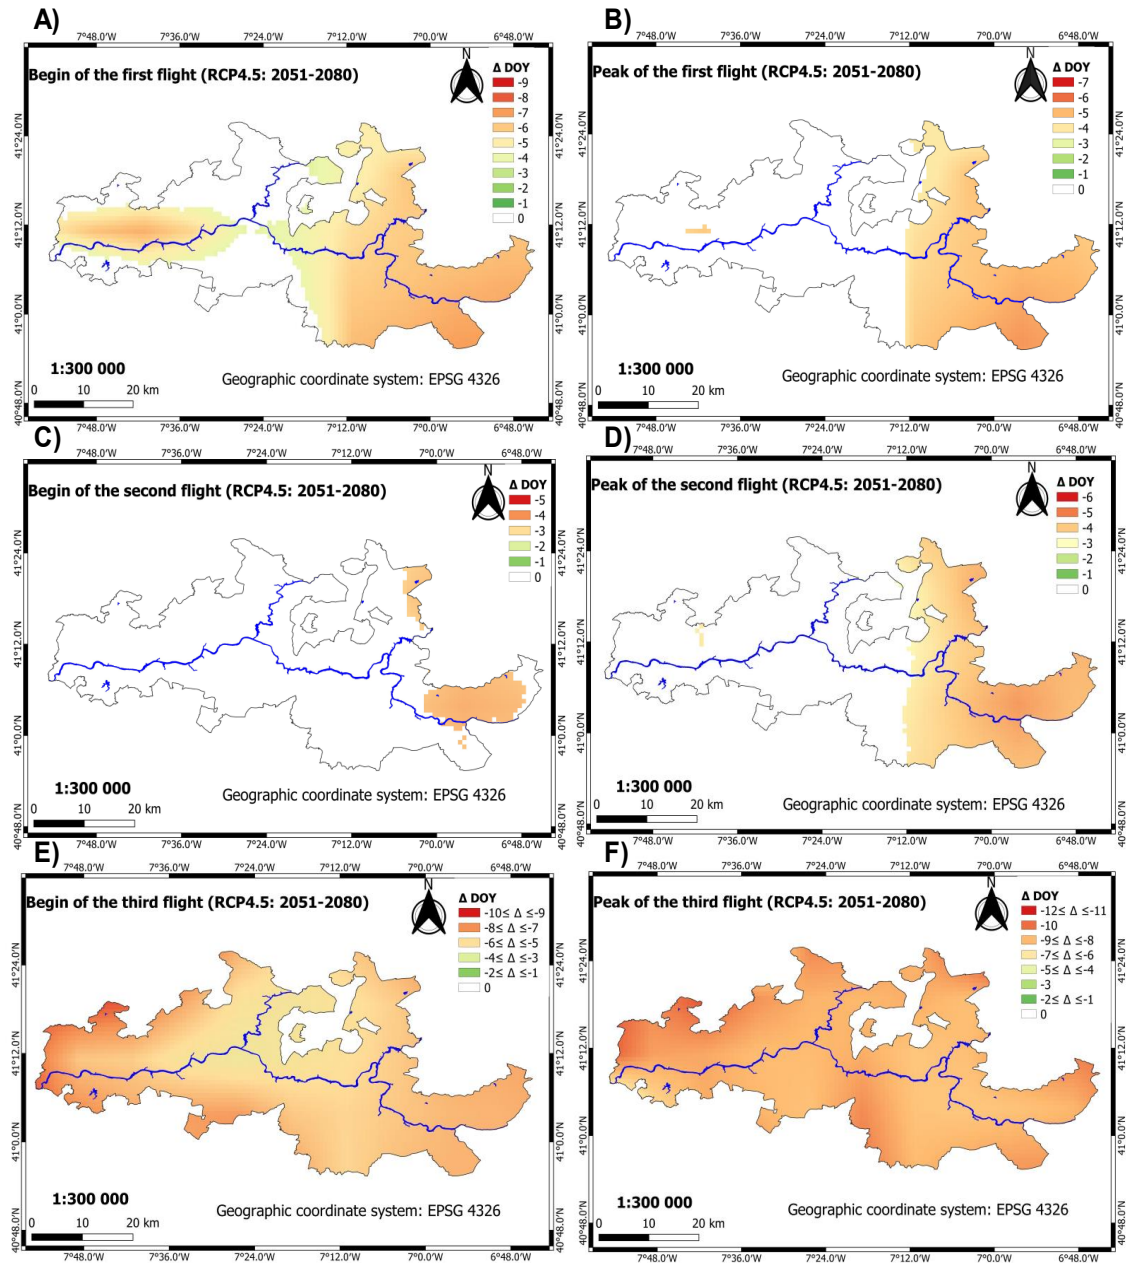

**Figure S2:** Difference between future and historic (RCP4.5) phenology maps covering the entire Douro Demarcated Region. The color scale shows the difference between future and historic ( $\Delta DOY$ ) for each beginning (left) and peak (right) of the flight, namely first (A) and (B), second (C) and (D) and third (E) and (F). In addition, it is integrated into the Douro river (thick blue line) along with the three sub-regions.

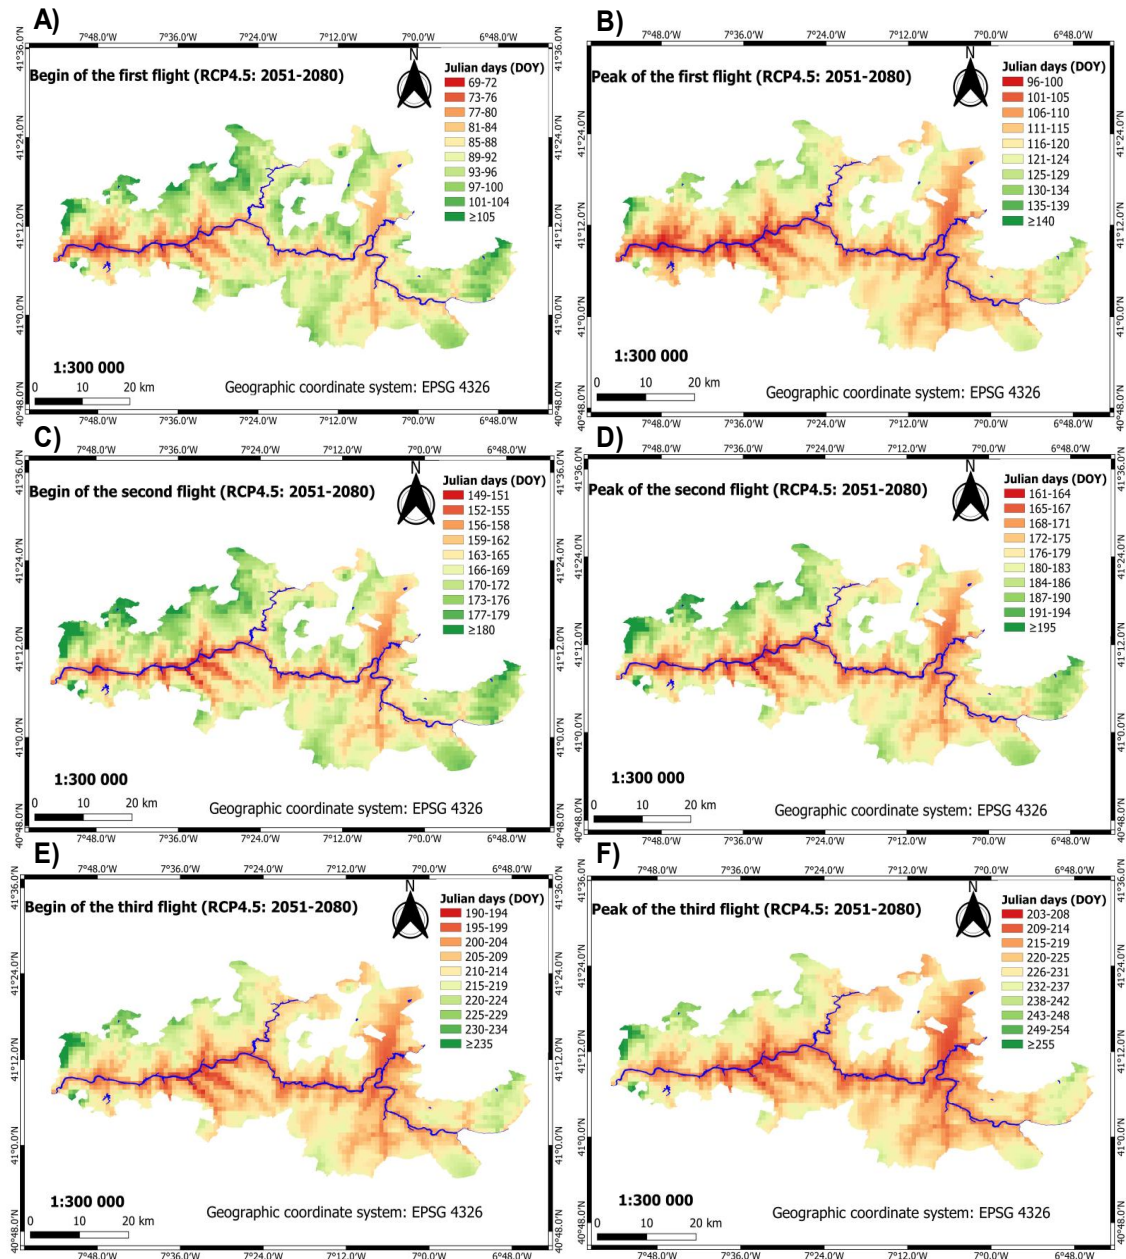

**Figure S3:** Phenology maps for the future period (2051–2080, RCP4.5) covering the entire Douro Demarcated Region. The color scale represents the Julian days (DOY) obtained by the phenology models for each beginning (left) and peak (right) of the flight, namely the first (A) and (B), second (C) and (D) and third (E) and (F). In addition, it is integrated into the Douro river (thick blue line) along with the three sub-regions.



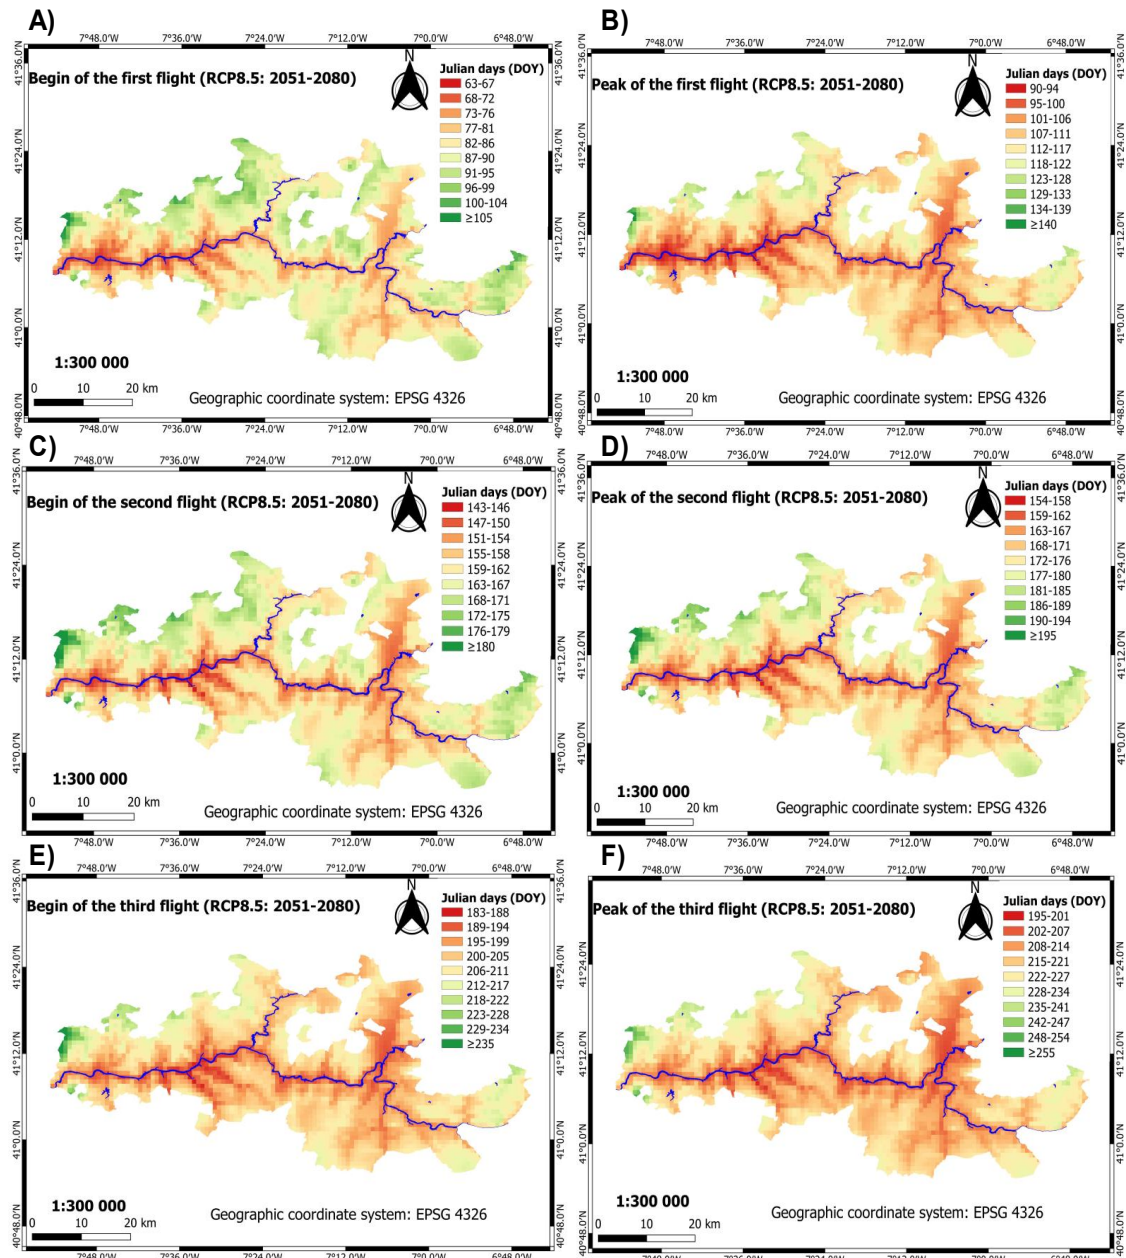

**Figure S4:** Phenology maps for the future period (2051–2080, RCP8.5) covering the entire Douro Demarcated Region. The color scale represents the Julian days (DOY) obtained by the phenology models for each beginning (left) and peak (right) of the flight, namely the first (A) and (B), second (C) and (D) and third (E) and (F). In addition, it is integrated into the Douro river (thick blue line) along with the three sub-regions.
