# Supplementary material for: European Grapevine Moth and Vitis vinifera L. Phenology in the Douro Region: (A)synchrony and Climate Scenarios
Source: MDPI journal article supplement (doi:10.3390/agronomy12010098), 2021-12-31
Supplement: s1 [file s1]

Archive with 1 entries (1 files):
- agronomy-1446874-supplementary.pdf
